# Supplementary material for: Control of lupus nephritis by changes of gut microbiota
Source: PubMed Central journal article supplement (PMC5505136; doi:10.1186/s40168-017-0300-8), 2017-07-11
Supplement: 40168_2017_300_MOESM2_ESM.pdf [file 40168_2017_300_MOESM2_ESM.pdf]

Table S1. Actual abundance number and P values for Figure 1A.

| Weeks              | 5           |             |             |             |             |
|--------------------|-------------|-------------|-------------|-------------|-------------|
| Treatment          | PBS         |             | Lacto       |             |             |
| Statistics         | MEAN        | SEM         | MEAN        | SEM         | p value     |
| Other              | 0.001452573 | 0.000370512 | 0.00216467  | 0.000611468 | 0.384227986 |
| Bifidobacteriales  | 0.000092862 | 3.92E-05    | 0.02107776  | 7.61E-03    | 0.110273902 |
| Coriobacteriales   | 0.000619615 | 0.000367978 | 0.000702969 | 0.000155201 | 0.84493291  |
| Bacteroidales      | 0.5401281   | 0.123787605 | 0.47425     | 0.020228301 | 0.634076753 |
| Streptophyta       | 0.00E+00    | 0.00E+00    | 3.85E-04    | 1.50E-04    | 0.124598367 |
| Bacillales         | 0.00E+00    | 0.00E+00    | 4.36E-05    | 4.36E-05    | 0.422649731 |
| Lactobacillales    | 0.03588617  | 0.012585734 | 0.18035717  | 0.032055487 | 0.032036483 |
| Turicibacterales   | 0.00011632  | 2.41E-05    | 0.006149833 | 3.17E-03    | 0.19775303  |
| Clostridiales      | 0.40060196  | 0.125280413 | 0.2721557   | 0.017436391 | 0.382132001 |
| Erysipelotrichales | 0.003531374 | 0.002670929 | 0.002559914 | 0.000878528 | 0.74884078  |
| Desulfovibrionales | 0.012642986 | 0.008916869 | 0.0000218   | 0.0000218   | 0.251894434 |
| Anaeroplasmatales  | 7.36E-05    | 7.36E-05    | 1.88E-02    | 1.80E-02    | 0.406822606 |
| RF39               | 0.001854032 | 1.85E-03    | 0.010568362 | 5.06E-03    | 0.220497569 |
| Verrucomicrobiales | 0.001006175 | 0.000445068 | 0.009579891 | 0.004264091 | 0.180799451 |

| Weeks              | 7           |             |             |             |             |
|--------------------|-------------|-------------|-------------|-------------|-------------|
| Treatment          | PBS         |             | Lacto       |             |             |
| Statistics         | MEAN        | SEM         | MEAN        | SEM         | p value     |
| Other              | 0.000524403 | 0.000150731 | 0.002737741 | 0.000726588 | 0.087234024 |
| Bifidobacteriales  | 0.000627973 | 1.50E-04    | 0.011039188 | 3.65E-03    | 0.103643606 |
| Coriobacteriales   | 0.001299495 | 0.000184289 | 0.00095909  | 0.000311355 | 0.409186181 |
| Bacteroidales      | 0.8885538   | 0.009011444 | 0.48228     | 0.056124398 | 0.01657491  |
| Streptophyta       | 0.00E+00    | 0.00E+00    | 3.06E-04    | 2.27E-04    | 0.309581077 |
| Bacillales         | 0.00E+00    | 0.00E+00    | 1.35E-04    | 1.39E-05    | 0.010427194 |
| Lactobacillales    | 0.0172074   | 0.002096525 | 0.12035304  | 0.013731074 | 0.015537088 |
| Turicibacterales   | 0.000109734 | 8.86E-05    | 0.037399986 | 9.17E-03    | 0.0554803   |
| Clostridiales      | 0.03873227  | 0.006289114 | 0.28855133  | 0.042499258 | 0.025623019 |
| Erysipelotrichales | 0.006706814 | 0.003302802 | 0.000984563 | 0.000159452 | 0.181545385 |
| Desulfovibrionales | 0.004205423 | 0.000753264 | 0           | 0           | 0.011346626 |
| Anaeroplasmatales  | 0.00E+00    | 0.00E+00    | 1.71E-03    | 5.89E-04    | 0.101267906 |
| RF39               | 0.000183998 | 8.40E-05    | 0.01432384  | 2.64E-03    | 0.032954713 |
| Verrucomicrobiales | 0.041564902 | 0.013463065 | 0.037422723 | 0.004943481 | 0.787935912 |

| Weeks              | 9           |             |             |             |             |
|--------------------|-------------|-------------|-------------|-------------|-------------|
| Treatment          | PBS         |             | Lacto       |             |             |
| Statistics         | MEAN        | SEM         | MEAN        | SEM         | p value     |
| Other              | 0.001179841 | 0.000215487 | 0.002060316 | 0.00060893  | 0.28237675  |
| Bifidobacteriales  | 0.000173265 | 3.64E-05    | 0.020236536 | 1.35E-02    | 0.275678213 |
| Coriobacteriales   | 0.000572581 | 0.000167994 | 0.00087324  | 0.000603636 | 0.672949478 |
| Bacteroidales      | 0.7684187   | 0.067381031 | 0.7274715   | 0.143177924 | 0.813148092 |
| Streptophyta       | 3.31E-05    | 3.31E-05    | 3.30E-05    | 3.30E-05    | 0.99902676  |
| Bacillales         | 0.00E+00    | 0.00E+00    | 1.84E-05    | 1.84E-05    | 0.422649731 |
| Lactobacillales    | 0.01445834  | 0.004780232 | 0.04774062  | 0.024813723 | 0.310678136 |
| Turicibacterales   | 0           | 0.00E+00    | 0.012634576 | 6.84E-03    | 0.206118694 |
| Clostridiales      | 0.19102699  | 0.065791882 | 0.09272055  | 0.067204723 | 0.346068818 |
| Erysipelotrichales | 0.002734678 | 0.000913612 | 0.063304566 | 0.025064664 | 0.13674604  |
| Desulfovibrionales | 0.009829324 | 0.002530869 | 0.002063896 | 0.002036358 | 0.062356017 |
| Anaeroplasmatales  | 1.65E-05    | 1.65E-05    | 5.52E-05    | 5.52E-05    | 0.561822261 |
| RF39               | 0.000713047 | 1.68E-04    | 0.004125837 | 2.41E-03    | 0.292029554 |

|                    |             |             |             |             |             |
|--------------------|-------------|-------------|-------------|-------------|-------------|
| Verrucomicrobiales | 0.010012565 | 0.004005088 | 0.026427306 | 0.012246911 | 0.310820363 |
|--------------------|-------------|-------------|-------------|-------------|-------------|

| Weeks              | 11          |             |             |             |             |
|--------------------|-------------|-------------|-------------|-------------|-------------|
| Treatment          | PBS         |             | Lacto       |             |             |
| Statistics         | MEAN        | SEM         | MEAN        | SEM         | p value     |
| Other              | 0.0015511   | 0.000422145 | 0.005397532 | 0.001573434 | 0.126031396 |
| Bifidobacteriales  | 0.000963766 | 2.35E-04    | 0.030241667 | 5.72E-03    | 0.035964901 |
| Coriobacteriales   | 0.000948233 | 0.000124655 | 0.000752113 | 0.000173865 | 0.412418221 |
| Bacteroidales      | 0.8577791   | 0.04436129  | 0.5344842   | 0.060398192 | 0.012714167 |
| Streptophyta       | 0.00E+00    | 0.00E+00    | 6.88E-05    | 6.88E-05    | 0.422649731 |
| Bacillales         | 0.00E+00    | 0.00E+00    | 0.00E+00    | 0.00E+00    | NA          |
| Lactobacillales    | 0.04488269  | 0.006875729 | 0.08236474  | 0.017565435 | 0.154292602 |
| Turicibacterales   | 0.000014425 | 1.44E-05    | 0.017864688 | 7.61E-03    | 0.143545561 |
| Clostridiales      | 0.05749012  | 0.025185905 | 0.16563324  | 0.018845935 | 0.018684562 |
| Erysipelotrichales | 0.001799617 | 0.00065857  | 0.06854392  | 0.030589244 | 0.160784098 |
| Desulfovibrionales | 0.008013002 | 0.001295393 | 0           | 0           | 0.008508772 |
| Anaeroplasmatales  | 2.77E-05    | 2.77E-05    | 3.41E-03    | 1.29E-03    | 0.119946046 |
| RF39               | 0.0006894   | 3.40E-04    | 0.006711107 | 3.07E-03    | 0.187114942 |
| Verrucomicrobiales | 0.025698467 | 0.014244709 | 0.082181708 | 0.012088862 | 0.029361225 |

| Weeks              | 14          |             |             |             |             |
|--------------------|-------------|-------------|-------------|-------------|-------------|
| Treatment          | PBS         |             | Lacto       |             |             |
| Statistics         | MEAN        | SEM         | MEAN        | SEM         | p value     |
| Other              | 0.001548314 | 0.000439488 | 0.002193821 | 0.000141268 | 0.276852368 |
| Bifidobacteriales  | 0.000042834 | 4.28E-05    | 0.002235171 | 9.36E-04    | 0.143638118 |
| Coriobacteriales   | 0.000421716 | 0.000246127 | 0.002970328 | 0.000601906 | 0.036861121 |
| Bacteroidales      | 0.7222189   | 0.056756945 | 0.6966961   | 0.018843767 | 0.704375055 |
| Streptophyta       | 5.65E-05    | 5.65E-05    | 1.74E-05    | 1.74E-05    | 0.56717533  |
| Bacillales         | 0.00E+00    | 0.00E+00    | 7.09E-05    | 4.72E-05    | 0.272133488 |
| Lactobacillales    | 0.12120064  | 0.0333571   | 0.03286482  | 0.008295913 | 0.110345824 |
| Turicibacterales   | 0.000112891 | 6.12E-05    | 0.04865019  | 3.14E-02    | 0.262036009 |
| Clostridiales      | 0.1249025   | 0.042536811 | 0.16958349  | 0.030880544 | 0.447461283 |
| Erysipelotrichales | 0.005403821 | 0.001992299 | 0.017476305 | 0.004893869 | 0.118251439 |
| Desulfovibrionales | 0.0091254   | 0.007163194 | 0.006418948 | 0.000838769 | 0.742671081 |
| Anaeroplasmatales  | 1.78E-04    | 1.26E-04    | 1.74E-05    | 1.74E-05    | 0.329434135 |
| RF39               | 0.003346736 | 2.68E-03    | 0.013073884 | 5.37E-03    | 0.20526692  |
| Verrucomicrobiales | 0.010683399 | 0.005327827 | 0.006605397 | 0.004579481 | 0.593398129 |
