# Supplementary material for: Control of lupus nephritis by changes of gut microbiota
Source: PubMed Central journal article supplement (PMC5505136; doi:10.1186/s40168-017-0300-8), 2017-07-11
Supplement: 40168_2017_300_MOESM3_ESM.pdf [file 40168_2017_300_MOESM3_ESM.pdf]

Table S2. Actual abundance numbers and P values for Figure S3B.

| Weeks              | 5           |             |             |             |             |
|--------------------|-------------|-------------|-------------|-------------|-------------|
| Treatment          | casLac      | casLac      | casPBS      | casPBS      |             |
| Statistic          | MEAN        | SEM         | MEAN        | SEM         | p value     |
| Other              | 1.88E-03    | 3.27E-04    | 9.91E-04    | 4.60E-04    | 1.71E-01    |
| Bifidobacteriales  | 7.60E-05    | 4.46E-05    | 1.66E-04    | 9.57E-05    | 4.40E-01    |
| Coriobacteriales   | 0.002318456 | 0.00048959  | 0.001298869 | 0.00033862  | 0.143730833 |
| Bacteroidales      | 0.65898997  | 0.07406453  | 0.72853486  | 0.04060265  | 0.45041299  |
| Lactobacillales    | 0.069507148 | 0.020791338 | 0.026217455 | 0.00328907  | 0.127583689 |
| Turicibacterales   | 0.000022    | 0.000022    | 0.000274586 | 0.000274586 | 0.426012513 |
| Clostridiales      | 0.20814803  | 0.06734302  | 0.07872618  | 0.02991658  | 0.15145237  |
| Erysipelotrichales | 0.022072799 | 0.009030085 | 0.012520727 | 0.006376837 | 0.424283897 |
| Desulfovibrionales | 0.013110297 | 0.00475884  | 0.021730458 | 0.007876509 | 0.392460652 |
| Pseudomonadales    | 0           | 0           | 0           | 0           | NA          |
| RF39               | 0.004098654 | 0.001851928 | 0.000746622 | 0.000610514 | 0.167676606 |
| Verrucomicrobiales | 0.018972559 | 0.008849053 | 0.128179226 | 0.03458968  | 0.046875547 |

| Weeks              | 5           |             |             |             |             |
|--------------------|-------------|-------------|-------------|-------------|-------------|
| Treatment          | Lacto       | Lacto       | PBS         | PBS         |             |
| Statistic          | MEAN        | SEM         | MEAN        | SEM         | p value     |
| Other              | 0.002133654 | 0.000440247 | 0.001780878 | 0.000994771 | 0.761473591 |
| Bifidobacteriales  | 2.17E-02    | 7.61E-03    | 2.12E-04    | 9.49E-05    | 6.66E-02    |
| Coriobacteriales   | 1.01E-03    | 7.92E-05    | 4.97E-03    | 2.96E-03    | 2.73E-01    |
| Bacteroidales      | 0.54483255  | 0.05261082  | 0.74439344  | 0.09615423  | 0.13269717  |
| Lactobacillales    | 0.1259709   | 0.042995551 | 0.02562808  | 0.001771589 | 0.101682879 |
| Turicibacterales   | 8.26E-03    | 4.44E-03    | 1.04E-04    | 1.04E-04    | 1.64E-01    |
| Clostridiales      | 0.26498701  | 0.03382335  | 0.16375219  | 0.10536628  | 0.41719608  |
| Erysipelotrichales | 0.006740843 | 0.005929821 | 0.010262243 | 0.003974025 | 0.641765972 |
| Desulfovibrionales | 0.001084343 | 0.001061798 | 0.01077755  | 0.007176047 | 0.270284012 |
| Pseudomonadales    | 0           | 0           | 0.00000885  | 0.00000885  | 0.39100222  |
| RF39               | 0.00630326  | 0.001338273 | 0.002672465 | 0.002555706 | 0.269150808 |
| Verrucomicrobiales | 0.013911013 | 0.013569701 | 0.034730827 | 0.01709158  | 0.378719185 |

| Weeks              | 7           |             |             |             |             |
|--------------------|-------------|-------------|-------------|-------------|-------------|
| Treatment          | casLac      | casLac      | casPBS      | casPBS      |             |
| Statistic          | MEAN        | SEM         | MEAN        | SEM         | p value     |
| Other              | 1.02E-03    | 1.12E-04    | 2.49E-03    | 9.81E-04    | 2.32E-01    |
| Bifidobacteriales  | 1.47E-04    | 1.17E-04    | 1.43E-03    | 7.47E-04    | 1.85E-01    |
| Coriobacteriales   | 0.002021423 | 0.000452472 | 0.003220117 | 0.001510557 | 0.494681854 |
| Bacteroidales      | 0.74863468  | 0.05374217  | 0.75666965  | 0.0216248   | 0.89647442  |
| Lactobacillales    | 0.028693742 | 0.009577681 | 0.060462591 | 0.028803809 | 0.359493072 |
| Turicibacterales   | 0.003115383 | 0.001866299 | 0.005080427 | 0.002525604 | 0.556433601 |
| Clostridiales      | 0.12458455  | 0.06431244  | 0.0974369   | 0.02744007  | 0.71733874  |
| Erysipelotrichales | 0.016871778 | 0.000702098 | 0.033303519 | 0.010102686 | 0.202273652 |
| Desulfovibrionales | 0.004065542 | 0.001773447 | 0.007550715 | 0.003139972 | 0.380529794 |
| Pseudomonadales    | 0           | 0           | 0.000013225 | 0.000013225 | 0.391002219 |
| RF39               | 0.001115043 | 0.000599133 | 0.001733442 | 0.001015376 | 0.622929694 |
| Verrucomicrobiales | 0.068505605 | 0.027813289 | 0.029443069 | 0.022818852 | 0.320771067 |

| Weeks     | 7     |       |     |     |  |
|-----------|-------|-------|-----|-----|--|
| Treatment | Lacto | Lacto | PBS | PBS |  |

| Statistic          | MEAN        | SEM         | MEAN        | SEM         | p value     |
|--------------------|-------------|-------------|-------------|-------------|-------------|
| Other              | 0.001369887 | 0.000468664 | 0.002187598 | 0.000566675 | 0.310133421 |
| Bifidobacteriales  | 3.32E-02    | 1.17E-02    | 1.72E-03    | 5.71E-04    | 7.49E-02    |
| Coriobacteriales   | 1.55E-03    | 4.62E-04    | 3.79E-03    | 1.61E-03    | 2.61E-01    |
| Bacteroidales      | 0.63718011  | 0.04389722  | 0.82626518  | 0.03215729  | 0.01521871  |
| Lactobacillales    | 0.099531143 | 0.012442523 | 0.04474734  | 0.009566531 | 0.014395799 |
| Turicibacterales   | 5.91E-05    | 2.30E-05    | 1.68E-04    | 9.66E-05    | 3.46E-01    |
| Clostridiales      | 0.19652864  | 0.0320302   | 0.06156984  | 0.02446975  | 0.01709304  |
| Erysipelotrichales | 0.011847065 | 0.002479705 | 0.042096026 | 0.007287745 | 0.020008427 |
| Desulfovibrionales | 0.001603372 | 0.00158781  | 0.005108926 | 0.001659496 | 0.177878762 |
| Pseudomonadales    | 0           | 0           | 0           | 0           | NA          |
| RF39               | 0.000786616 | 0.000180855 | 0.000851832 | 0.000253996 | 0.841963996 |
| Verrucomicrobiales | 0.015723199 | 0.004141369 | 0.011124079 | 0.008778269 | 0.658823187 |

| Weeks              | 9           |             |             |             |             |
|--------------------|-------------|-------------|-------------|-------------|-------------|
| Treatment          | casLac      | casLac      | casPBS      | casPBS      |             |
| Statistic          | MEAN        | SEM         | MEAN        | SEM         | p value     |
| Other              | 1.19E-03    | 1.68E-04    | 5.05E-03    | 5.85E-04    | 4.92E-03    |
| Bifidobacteriales  | 1.83E-03    | 1.53E-03    | 1.82E-03    | 9.47E-04    | 9.96E-01    |
| Coriobacteriales   | 0.003866808 | 0.001445387 | 0.005086833 | 0.001560079 | 0.587156541 |
| Bacteroidales      | 0.69708664  | 0.03703206  | 0.71183671  | 0.07224801  | 0.86377042  |
| Lactobacillales    | 0.097681943 | 0.043905201 | 0.020185638 | 0.005135462 | 0.175415564 |
| Turicibacterales   | 0.005837083 | 0.001319531 | 0.006628445 | 0.001293824 | 0.683439196 |
| Clostridiales      | 0.10688213  | 0.02024616  | 0.1617455   | 0.07175755  | 0.50838603  |
| Erysipelotrichales | 0.027706968 | 0.002257748 | 0.043127226 | 0.008271498 | 0.157952796 |
| Desulfovibrionales | 0.002437072 | 0.000654038 | 0.012432977 | 0.006074139 | 0.198261908 |
| Pseudomonadales    | 0           | 0           | 0           | 0           | NA          |
| RF39               | 0.002425387 | 0.001084299 | 0.003270124 | 0.000800935 | 0.555889323 |
| Verrucomicrobiales | 0.051970944 | 0.020233839 | 0.027943659 | 0.023111052 | 0.464327766 |

| Weeks              | 9           |             |             |             |             |
|--------------------|-------------|-------------|-------------|-------------|-------------|
| Treatment          | Lacto       | Lacto       | PBS         | PBS         |             |
| Statistic          | MEAN        | SEM         | MEAN        | SEM         | p value     |
| Other              | 0.001661367 | 0.000200342 | 0.002293191 | 0.001099833 | 0.609174841 |
| Bifidobacteriales  | 6.80E-03    | 4.38E-03    | 1.11E-03    | 9.01E-04    | 2.67E-01    |
| Coriobacteriales   | 1.70E-03    | 2.78E-04    | 5.03E-04    | 2.71E-04    | 1.80E-02    |
| Bacteroidales      | 0.68886328  | 0.02161542  | 0.73206258  | 0.03225564  | 0.31236925  |
| Lactobacillales    | 0.097518717 | 0.026749256 | 0.068678135 | 0.013327988 | 0.373283931 |
| Turicibacterales   | 2.32E-03    | 7.65E-04    | 1.74E-03    | 1.74E-03    | 7.75E-01    |
| Clostridiales      | 0.16846751  | 0.03422999  | 0.13423811  | 0.04456423  | 0.56471808  |
| Erysipelotrichales | 0.006453293 | 0.001478429 | 0.014046022 | 0.005328153 | 0.251854971 |
| Desulfovibrionales | 0.004114528 | 0.001816422 | 0.003451929 | 0.002694578 | 0.845771309 |
| Pseudomonadales    | 0           | 0           | 0           | 0           | NA          |
| RF39               | 0.005245345 | 0.002419961 | 0.00128824  | 0.000251619 | 0.177683736 |
| Verrucomicrobiales | 0.015782061 | 0.002110858 | 0.039737085 | 0.013353363 | 0.17012938  |

| Weeks     | 11       |          |          |          |          |
|-----------|----------|----------|----------|----------|----------|
| Treatment | casLac   | casLac   | casPBS   | casPBS   |          |
| Statistic | MEAN     | SEM      | MEAN     | SEM      | p value  |
| Other     | 8.73E-04 | 7.63E-05 | 7.86E-03 | 1.94E-03 | 3.65E-02 |

|                    |             |             |             |             |             |
|--------------------|-------------|-------------|-------------|-------------|-------------|
| Bifidobacteriales  | 2.46E-03    | 4.48E-04    | 1.69E-03    | 1.08E-03    | 5.48E-01    |
| Coriobacteriales   | 0.013871297 | 0.005531196 | 0.007494353 | 0.002622788 | 0.352717748 |
| Bacteroidales      | 0.56173997  | 0.06310262  | 0.54480779  | 0.06213252  | 0.85467603  |
| Lactobacillales    | 0.157924052 | 0.030784302 | 0.084091084 | 0.009853121 | 0.091603386 |
| Turicibacterales   | 0.038294016 | 0.012909676 | 0.022051756 | 0.013031102 | 0.409986364 |
| Clostridiales      | 0.12206408  | 0.04941929  | 0.16295402  | 0.0424685   | 0.55393208  |
| Erysipelotrichales | 0.017164093 | 0.006764457 | 0.121427183 | 0.070927541 | 0.238006682 |
| Desulfovibrionales | 0.0251038   | 0.016657861 | 0.003422128 | 0.001304073 | 0.28419387  |
| Pseudomonadales    | 0.000351065 | 0.000351065 | 0           | 0           | 0.391002219 |
| RF39               | 0.005269835 | 0.00294519  | 0.004433833 | 0.001526874 | 0.81212927  |
| Verrucomicrobiales | 0.054084167 | 0.028354038 | 0.037139677 | 0.012269051 | 0.611972554 |

| Weeks              | 11          |             |             |             |             |
|--------------------|-------------|-------------|-------------|-------------|-------------|
| Treatment          | Lacto       | Lacto       | PBS         | PBS         |             |
| Statistic          | MEAN        | SEM         | MEAN        | SEM         | p value     |
| Other              | 0.002037516 | 0.000203155 | 0.002834064 | 0.000336026 | 0.096334406 |
| Bifidobacteriales  | 6.21E-03    | 2.83E-03    | 2.33E-04    | 1.79E-04    | 8.81E-02    |
| Coriobacteriales   | 2.07E-03    | 5.19E-04    | 7.00E-04    | 2.89E-04    | 5.23E-02    |
| Bacteroidales      | 0.65827902  | 0.03168871  | 0.6820005   | 0.01541356  | 0.5224556   |
| Lactobacillales    | 0.138316054 | 0.043488781 | 0.053721392 | 0.012893275 | 0.112772349 |
| Turicibacterales   | 8.59E-03    | 2.34E-03    | 1.49E-03    | 8.76E-04    | 2.81E-02    |
| Clostridiales      | 0.15334964  | 0.04614749  | 0.22263502  | 0.02983318  | 0.243828    |
| Erysipelotrichales | 0.008903347 | 0.002135906 | 0.013420258 | 0.005755841 | 0.504305981 |
| Desulfovibrionales | 0.002637979 | 0.001391379 | 0.003688562 | 0.001752111 | 0.654148595 |
| Pseudomonadales    | 0           | 0           | 0           | 0           | NA          |
| RF39               | 0.001526645 | 0.000703586 | 0.003555801 | 0.00174738  | 0.342176794 |
| Verrucomicrobiales | 0.017207687 | 0.007012525 | 0.014056552 | 0.006963839 | 0.758509433 |

| Weeks              | 14          |             |             |             |             |
|--------------------|-------------|-------------|-------------|-------------|-------------|
| Treatment          | casLac      | casLac      | casPBS      | casPBS      |             |
| Statistic          | MEAN        | SEM         | MEAN        | SEM         | p value     |
| Other              | 5.08E-03    | 9.81E-04    | 1.69E-03    | 3.38E-04    | 2.29E-02    |
| Bifidobacteriales  | 2.35E-03    | 1.24E-03    | 3.00E-03    | 4.78E-04    | 6.44E-01    |
| Coriobacteriales   | 0.014413868 | 0.004567948 | 0.006526733 | 0.001132337 | 0.161304346 |
| Bacteroidales      | 0.57177803  | 0.09196368  | 0.44810113  | 0.04068063  | 0.26925288  |
| Lactobacillales    | 0.154126162 | 0.055162185 | 0.040621283 | 0.007047685 | 0.108599273 |
| Turicibacterales   | 0.026008516 | 0.005100761 | 0.018255002 | 0.004513892 | 0.292450112 |
| Clostridiales      | 0.06721808  | 0.0083912   | 0.13601098  | 0.0186662   | 0.02617379  |
| Erysipelotrichales | 0.076590135 | 0.015289918 | 0.248800936 | 0.054771049 | 0.046707685 |
| Desulfovibrionales | 0.00956389  | 0.005383976 | 0.004718069 | 0.002382751 | 0.445040183 |
| Pseudomonadales    | 2.26282E-05 | 2.26282E-05 | 0           | 0           | 0.373900966 |
| RF39               | 0.019271608 | 0.008772698 | 0.007935718 | 0.000403859 | 0.266050151 |
| Verrucomicrobiales | 0.05261331  | 0.029477267 | 0.083959808 | 0.041455005 | 0.561489629 |

| Weeks             | 14         |             |             |             |            |
|-------------------|------------|-------------|-------------|-------------|------------|
| Treatment         | Lacto      | Lacto       | PBS         | PBS         |            |
| Statistic         | MEAN       | SEM         | MEAN        | SEM         | p value    |
| Other             | 0.00197856 | 0.000486302 | 0.002390608 | 0.000509941 | 0.5777235  |
| Bifidobacteriales | 1.15E-03   | 8.55E-04    | 2.15E-03    | 1.22E-03    | 5.24E-01   |
| Coriobacteriales  | 1.29E-03   | 6.86E-04    | 2.67E-03    | 8.31E-04    | 2.47E-01   |
| Bacteroidales     | 0.56671428 | 0.0657982   | 0.67993826  | 0.02499797  | 0.16751391 |

|                    |             |             |             |             |             |
|--------------------|-------------|-------------|-------------|-------------|-------------|
| Lactobacillales    | 0.125267816 | 0.018498725 | 0.042054841 | 0.008146301 | 0.007724948 |
| Turicibacterales   | 5.90E-03    | 2.26E-03    | 9.75E-03    | 3.29E-03    | 3.75E-01    |
| Clostridiales      | 0.18917369  | 0.04069534  | 0.1847858   | 0.03888411  | 0.94006422  |
| Erysipelotrichales | 0.015634245 | 0.004449733 | 0.044952811 | 0.013100892 | 0.107142535 |
| Desulfovibrionales | 0.002331799 | 0.00213604  | 0.010617768 | 0.003457928 | 0.095258016 |
| Pseudomonadales    | 0           | 0           | 0           | 0           | NA          |
| RF39               | 0.007996391 | 0.003095916 | 0.00290376  | 0.001450595 | 0.190465205 |
| Verrucomicrobiales | 0.081931813 | 0.029021054 | 0.017078962 | 0.008765417 | 0.088782908 |
